# Supplementary material for: Ginnalin A from Kujin tea (Acer tataricumsubsp.ginnala) exhibits a colorectal cancer chemoprevention effectviaactivation of the Nrf2/HO-1 signaling pathway
Source: Royal Society of Chemistry journal article supplement (doi:10.1039/c8fo00054a), 2018-01-01
Supplement: c8fo00054a1.pdf [file c8fo00054a1.pdf]

## Supporting Information

### **Ginnalin A from Kujin tea (*Acer tataricum* subsp. *ginnala*) exhibits colorectal cancer chemoprevention effect via activation of Nrf2/HO-1 signaling pathway**

Wu Bi<sup>1</sup>, Chun-nian He<sup>2</sup>, Xiao-xiao Li<sup>1</sup>, Liu-ying Zhou<sup>1</sup>, Rui-jie Liu<sup>1</sup>, Sai Zhang<sup>1</sup>, Guo-qing Li<sup>3</sup>, Zhu-chu Chen<sup>1</sup>, Peng-fei Zhang<sup>1\*</sup>

1 Key Laboratory of Cancer Proteomics of Chinese Ministry of Health, Xiangya Hospital, Central South University, Changsha, Hunan, 410008, P.R. China

2 Key Laboratory of Bioactive Substances and Resources Utilization of Chinese Herbal Medicine, Ministry of Education, Institute of Medicinal Plant Development, Chinese Academy of Medical Science and Peking Union Medical College, Beijing, 100193, P.R. China

3 Hunan Province Cooperative Innovation Center for Molecular Target New Drug Study, School of Pharmacy and Life Science, University of South China, Hengyang 421001, Hunan, China

### **\*Corresponding Author**

Key Laboratory of Cancer Proteomics of Chinese Ministry of Health, Xiangya

Hospital, Central South University

No. 87 Xiangya Road, Changsha, Hunan, 410008, P.R. China

E-mail: zhangpf690421@csu.edu.cn

Tel.: +86-731-84327239.

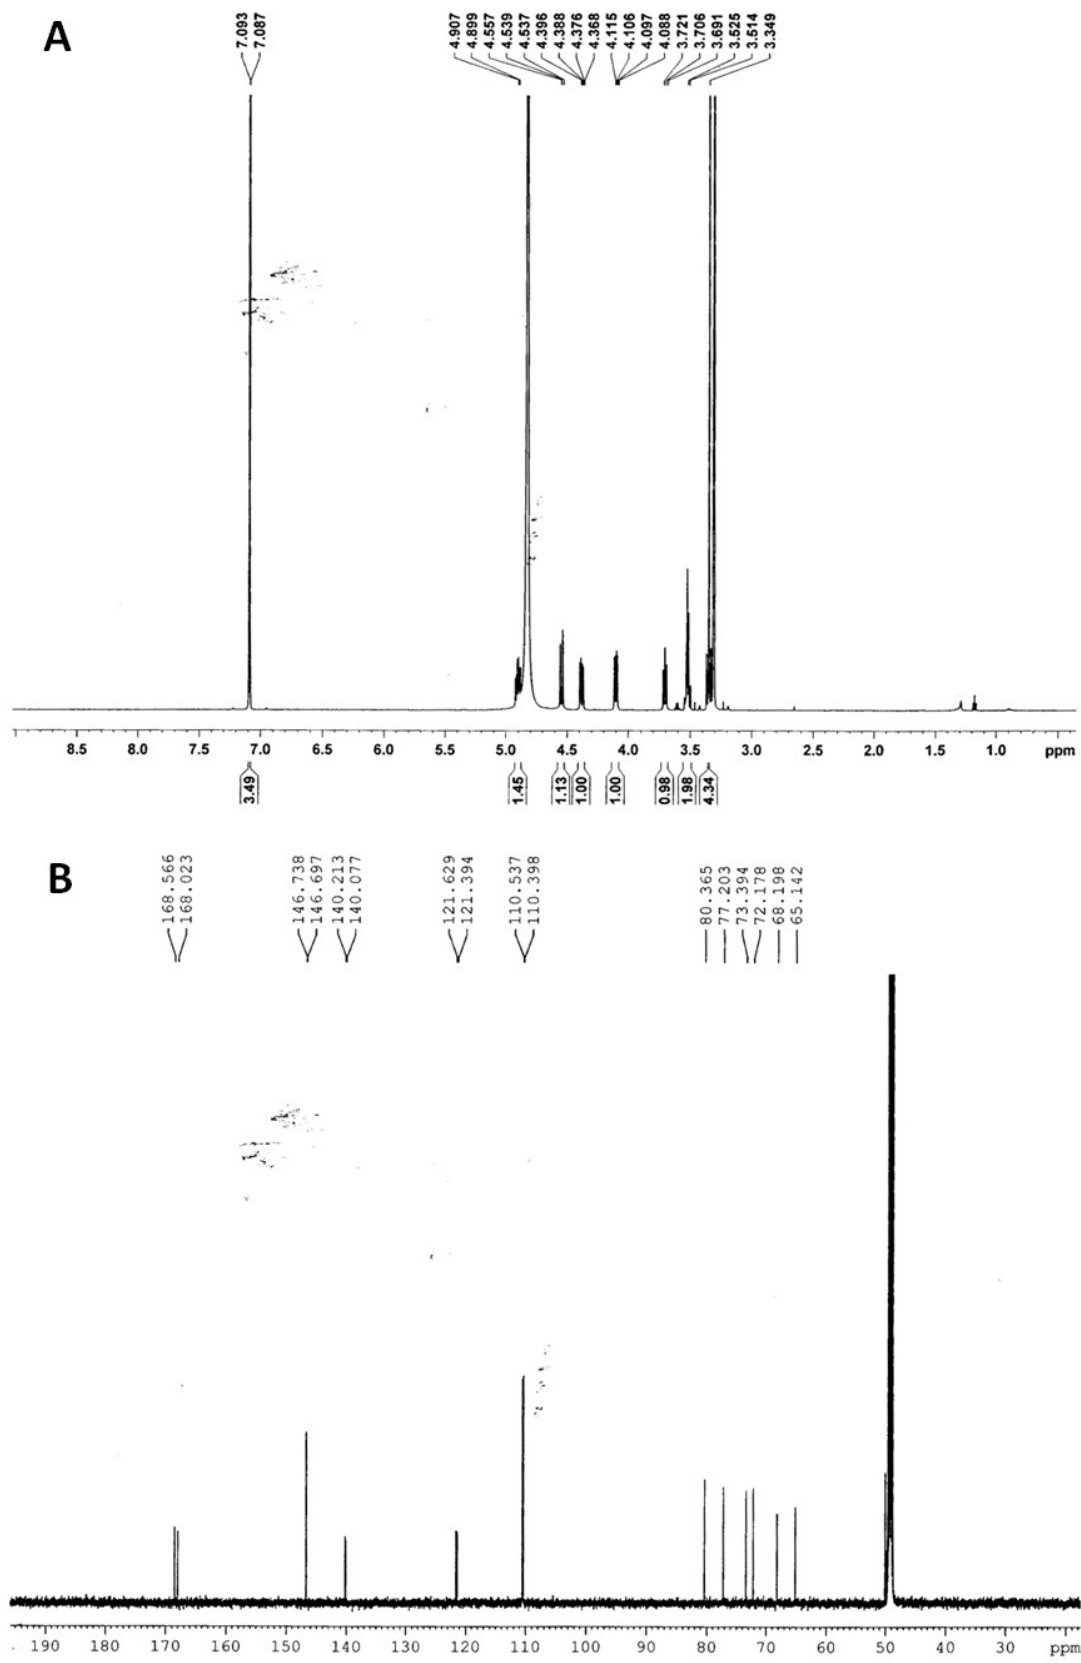

**Figure S1.**  $^1\text{H}$ -NMR and  $^{13}\text{C}$ -NMR spectrum of ginnalin A. (A),  $^1\text{H}$ -NMR spectrum of ginnalin A ( $\text{CD}_3\text{OD}$ , 600 MHz), (B),  $^{13}\text{C}$ -NMR spectrum of ginnalin A ( $\text{CD}_3\text{OD}$ , 151 MHz).

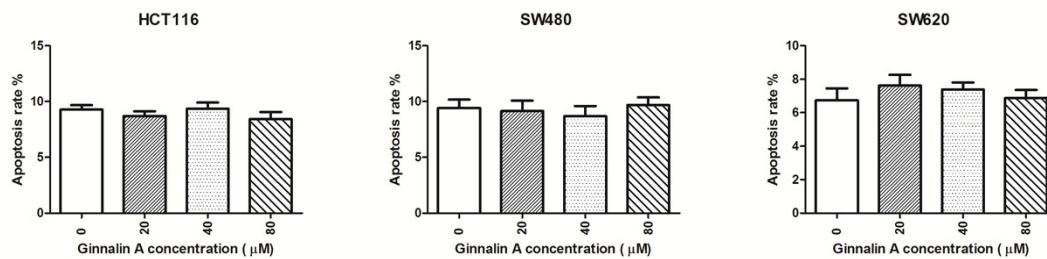

**Figure S2.** Analysis of cell apoptosis rate of HCT116, SW480, and SW620 cell lines treated with ginnalin A by flow cytometry. Cells were treated with various doses of ginnalin A (0, 20, 40 and 80 μM) for 72 h. Each value is the mean value  $\pm$  SD (n=3).
